# Supplementary material for: The Effectiveness of Group-Based Core Stability Exercise and Educational Booklet for Hospital Workers in Taiwan with Nonspecific Low Back Pain: A Preliminary Study
Source: MDPI journal article supplement (doi:10.3390/ijerph19063324), 2022-03-11
Supplement: s1 [file s1]

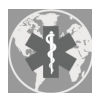

## Supplementary Material

**Table S1.** The content of core-stability exercise program.

| Core-Stability Exercise Program                                                                                                                            |               |               |       |                |                |       |       |       |
|------------------------------------------------------------------------------------------------------------------------------------------------------------|---------------|---------------|-------|----------------|----------------|-------|-------|-------|
|                                                                                                                                                            | Day 1         | Day 2         | Day 3 | Day 4          | Day 5          | Day 6 | Day 7 | Day 8 |
| Basis principle of Pilates:<br>Breathing, pelvic placement,<br>rib cage placement,<br>scapular movement and stabilization,<br>head and cervical placement. | V<br>(supine) | V<br>(supine) |       | V<br>(sitting) | V<br>(sitting) |       |       |       |
| Supine position                                                                                                                                            |               |               |       |                |                |       |       |       |
| Glute bridge                                                                                                                                               | V             | V             | V     | V              | V              | V     | V     |       |
| Pelvic tilt                                                                                                                                                | V             | V             | V     |                |                |       |       |       |
| Partial curl                                                                                                                                               |               |               | V     | V              | V              |       |       |       |
| Toe touch                                                                                                                                                  |               |               |       | V              | V              | V     | V     |       |
| Supine bicycle                                                                                                                                             |               |               |       |                | V              |       |       |       |
| Single leg bridge                                                                                                                                          |               |               |       |                |                | V     | V     |       |
| Dead bug                                                                                                                                                   |               |               |       |                |                | V     | V     |       |
| Prone position                                                                                                                                             |               |               |       |                |                |       |       |       |
| Swimmers                                                                                                                                                   | V             | V             | V     |                |                |       |       |       |
| Forearm plank                                                                                                                                              |               |               |       | V              | V              | V     | V     | V     |
| Plank body saw                                                                                                                                             |               |               |       | V              | V              |       |       |       |
| Plank single leg saw                                                                                                                                       |               |               |       | V              | V              |       |       |       |
| Plank crawl                                                                                                                                                |               |               |       |                | V              | V     | V     | V     |
| High plank                                                                                                                                                 |               |               |       |                |                | V     | V     | V     |
| Plank up down                                                                                                                                              |               |               |       |                |                |       | V     | V     |
| Panther shoulder tap                                                                                                                                       |               |               |       |                |                |       |       | V     |
| All four position                                                                                                                                          |               |               |       |                |                |       |       |       |
| Bear holds                                                                                                                                                 |               |               | V     |                |                | V     | V     | V     |
| Mountain climber                                                                                                                                           |               |               |       |                |                | V     | V     | V     |
| Bull dog                                                                                                                                                   |               |               |       |                |                |       | V     | V     |
| Bear plank walk                                                                                                                                            |               |               |       |                |                |       |       | V     |
| Standing position                                                                                                                                          |               |               |       |                |                |       |       |       |
| Squat                                                                                                                                                      | V             | V             | V     | V              | V              |       |       |       |
| Side lunge                                                                                                                                                 | V             | V             | V     |                |                | V     | V     |       |

|                        |   |   |   |   |   |
|------------------------|---|---|---|---|---|
| Alternating side lunge | V | V |   | V | V |
| Slide shuffle          | V | V |   | V | V |
| Carioca                | V | V |   |   |   |
| Calf raises            | V | V | V |   |   |
| High kicks             |   | V |   |   |   |
| Jump squats            |   | V | V | V |   |
| Standing core rotation |   | V | V | V |   |
| Oblique twist          |   |   |   | V | V |
| Foot fire              |   |   |   | V | V |
| Burpee jacks           |   |   |   |   | V |
| Foot fire—lateral      |   |   |   |   | V |
| Jumping jacks          |   |   |   |   | V |
| Lateral jumping jacks  |   |   |   |   | V |

Sixty minutes per session (including 10 min of warm-up and 5 min of cool-down); 2–3 sets × 5–10 reps for each as tolerated.
